# Supplementary material
Source: PubMed Central journal article supplement (PMC7127975)
Supplement: NIHMS1558781-supplement-6.pdf [file NIHMS1558781-supplement-6.pdf]

## Supplementary Tables

### Supplementary Table S1. Overview of nomenclature.

Complete list of sample IDs along with their tissues of origin, and the mouse strain from which the normal tissues were derived and in which the metastases were grown.

| ID    | Tissue      | Mouse strain   | Type       |
|-------|-------------|----------------|------------|
| BrSN1 | Brain       | NOD-SCID       | Normal     |
| BrSM1 | Brain       | NOD-SCID       | Metastasis |
| BrSM2 | Brain       | NOD-SCID       | Metastasis |
| BrSM3 | Brain       | NOD-SCID       | Metastasis |
| LuSN1 | Lung        | NOD-SCID       | Normal     |
| LuSM1 | Lung        | NOD-SCID       | Metastasis |
| LuSM2 | Lung        | NOD-SCID       | Metastasis |
| LuSM3 | Lung        | NOD-SCID       | Metastasis |
| LiGN1 | Liver       | NOD-SCID-gamma | Normal     |
| LiGM1 | Liver       | NOD-SCID-gamma | Metastasis |
| LiGM2 | Liver       | NOD-SCID-gamma | Metastasis |
| LiGM3 | Liver       | NOD-SCID-gamma | Metastasis |
| BoSN1 | Bone marrow | NOD-SCID       | Normal     |
| BoSM1 | Bone marrow | NOD-SCID       | Metastasis |
| BoSM2 | Bone marrow | NOD-SCID       | Metastasis |
| BoGN1 | Bone marrow | NOD-SCID-gamma | Normal     |
| BoGM1 | Bone marrow | NOD-SCID-gamma | Metastasis |
| BoGM2 | Bone marrow | NOD-SCID-gamma | Metastasis |

**Supplementary Table S2. Overview of tandem mass tag (TMT) assignment.**

Assignment of sample IDs per 10-plex TMT series, as well as which of the TMT labels was used for each sample. The tenth TMT label (131) was used for a common reference pool, containing equal parts of all samples, run in both TMT plexes.

| TMT plex | TMT label | ID    |
|----------|-----------|-------|
| A        | 129C      | BrSN1 |
| A        | 128N      | LuSN1 |
| A        | 130N      | LiGN1 |
| A        | 130C      | BoSN1 |
| A        | 129N      | BoGN1 |
| A        | 128C      | BrSM3 |
| A        | 127N      | LuSM2 |
| A        | 126       | LiGM3 |
| A        | 127C      | BoSM2 |
| B        | 128N      | BrSM1 |
| B        | 129C      | BrSM2 |
| B        | 128C      | LuSM1 |
| B        | 129N      | LuSM3 |
| B        | 130N      | LiGM1 |
| B        | 130C      | LiGM2 |
| B        | 126       | BoSM1 |
| B        | 127N      | BoGM1 |
| B        | 127C      | BoGM2 |

**Supplementary Table S3. shRNA sequences.**

List of all shRNA 97mers used for gene knockdown. Targeting nucleotides are bolded and underlined.

| Target Gene                  | Sequence (97mer)                                                                                                                      |
|------------------------------|---------------------------------------------------------------------------------------------------------------------------------------|
| Firefly luciferase (Control) | TGCTGTTGACAGTGAGCG <u><b>AGCTCCCGTGAATTGGAATCCT</b></u> AGTGAAGCC<br>ACAGATGT <u><b>AGGATTCCAATTCAGCGGGAGCCTGCCTACTGCCTCGGA</b></u>   |
| AGRN                         | TGCTGTTGACAGTGAGCG <u><b>CCACCAGGATCTTCTTTGTGAAT</b></u> AGTGAAGC<br>CACAGATGT <u><b>ATTCACAAAGAAGATCCTGGTGTGCCTACTGCCTCGGA</b></u>   |
| ANXA2                        | TGCTGTTGACAGTGAGCG <u><b>CCAGAGTCTACAAGGAAATGTA</b></u> AGTGAAGC<br>CACAGATGT <u><b>ATACATTTCTTGTAGACTCTGTTGCCTACTGCCTCGGA</b></u>    |
| FREM1                        | TGCTGTTGACAGTGAGCG <u><b>ACCCTTTAAATGTGAAATCTAA</b></u> AGTGAAGC<br>CACAGATGT <u><b>ATTAGATTTACATTTAAAGGGCTGCCTACTGCCTCGGA</b></u>    |
| HCFC1                        | TGCTGTTGACAGTGAGCG <u><b>AACCGTTCACTATTGTAGAGTATA</b></u> AGTGAAGC<br>CACAGATGT <u><b>ATACTCTACAATAGTGAACGGTGTGCCTACTGCCTCGGA</b></u> |
| HMCN1                        | TGCTGTTGACAGTGAGCG <u><b>AACTCAGGCTGTCAAATTAAT</b></u> AGTGAAGC<br>CACAGATGT <u><b>AATTTAATTTGACAGCCTGAGTCTGCCTACTGCCTCGGA</b></u>    |
| LGALS3                       | TGCTGTTGACAGTGAGCG <u><b>ACCTCGCATGCTGATAACAATTT</b></u> AGTGAAGC<br>CACAGATGT <u><b>AAATTGTTATCAGCATGCGAGGCTGCCTACTGCCTCGGA</b></u>  |
| PLOD3                        | TGCTGTTGACAGTGAGCG <u><b>ATCGGATCTTTCAGAACCTCA</b></u> AGTGAAGC<br>CACAGATGT <u><b>ATTGAGGTTCTGAAAGATCCGAGTGCCTACTGCCTCGGA</b></u>    |
| VWA9                         | TGCTGTTGACAGTGAGCG <u><b>CCAGATGTACAGAAGATTTTA</b></u> AGTGAAGC<br>CACAGATGT <u><b>ATTAATCTTCTGTACATCTGTTGCCTACTGCCTCGGA</b></u>      |

**Supplementary Table S4. sgRNA sequences.**

| Gene            | Species | sgRNA sequence                    |
|-----------------|---------|-----------------------------------|
| Timp1 (Control) | Mouse   | CATATTC <del>CCCAA</del> ACTTCCTG |
| SERPINB1        | Human   | CAAATTTGGGGATCTTGAC               |
| S100A4 sg1      | Human   | TAGGGCTTACCCGTTACCCA              |
| S100A4 sg2      | Human   | GGTGGGCACCCGTGGGTAAC              |
| S100A6          | Human   | AGCCAGCGCAGCGTCAATGT              |

**Supplementary Table S5. qPCR primers used.**

List of all primer pairs used for qPCR. All primers shown are designed to recognize human sequences.

| Gene     | Direction | Sequence (5' to 3')       |
|----------|-----------|---------------------------|
| ACTIN    | Forward   | ACCTTCTACAATGAGCTGCG      |
| ACTIN    | Reverse   | CCTGGATAGCAACGTACATGG     |
| AGRN     | Forward   | CTCAACTCCAGCCTCATGC       |
| AGRN     | Reverse   | GAAGCCGCACAGCATTC         |
| ANXA2    | Forward   | AGAGTTTCCCGCTTGGTTGA      |
| ANXA2    | Reverse   | TGTTCAAAGCATCCCGCTCA      |
| CSPG4    | Forward   | GAGCCCAGGCACGAAAAATG      |
| CSPG4    | Reverse   | GTATGTTTGGCCCCTCCGAA      |
| FREM1    | Forward   | TGCCTTGCCTCTCTTTACCAG     |
| FREM1    | Reverse   | AGGTGTATCAGGGTCGGTCA      |
| HCFC1    | Forward   | CCTGGCTCCATCCAACACAT      |
| HCFC1    | Reverse   | TCGATGCCATTGGCCACTTC      |
| HMCN1    | Forward   | GCTGATGGTAGTCTGTATGTGG    |
| HMCN1    | Reverse   | TCCTCGTTGATCTCCAAACAC     |
| LGALS3   | Forward   | TGGGGAAGGGAAGAAAGACA      |
| LGALS3   | Reverse   | TGAGCATCATTCACTGCAACC     |
| PLOD3    | Forward   | CTGGGCCTGGGAGAGGAGTG      |
| PLOD3    | Reverse   | TCACGTCGTAGCTATCCACAAACAT |
| S100A4   | Forward   | TCTTGGTTTGATCCTGACTGCT    |
| S100A4   | Reverse   | TCACCCTCTTTGCCCGAGTA      |
| S100A6   | Forward   | TAAACCGCGAATGTGCGTTG      |
| S100A6   | Reverse   | GACTGGCCTTATAGCGGTCG      |
| SERPINB1 | Forward   | ACTTAGGCGACCTCGGGA        |
| SERPINB1 | Reverse   | TGCTCCATGGTGAAAACCGA      |
| VWA9     | Forward   | ATGGGCACGGGCATTTCTTC      |
| VWA9     | Reverse   | CAGGTCGGGTCATGGAAAGG      |
